# Supplementary material for: Dynamics of gut microbiota during pregnancy in women with TPOAb-positive subclinical hypothyroidism: a prospective cohort study
Source: PubMed Central journal article supplement (PMC9316685; doi:10.1186/s12884-022-04923-5), 2022-07-26
Supplement: 12884_2022_4923_MOESM1_ESM.pdf [file 12884_2022_4923_MOESM1_ESM.pdf]

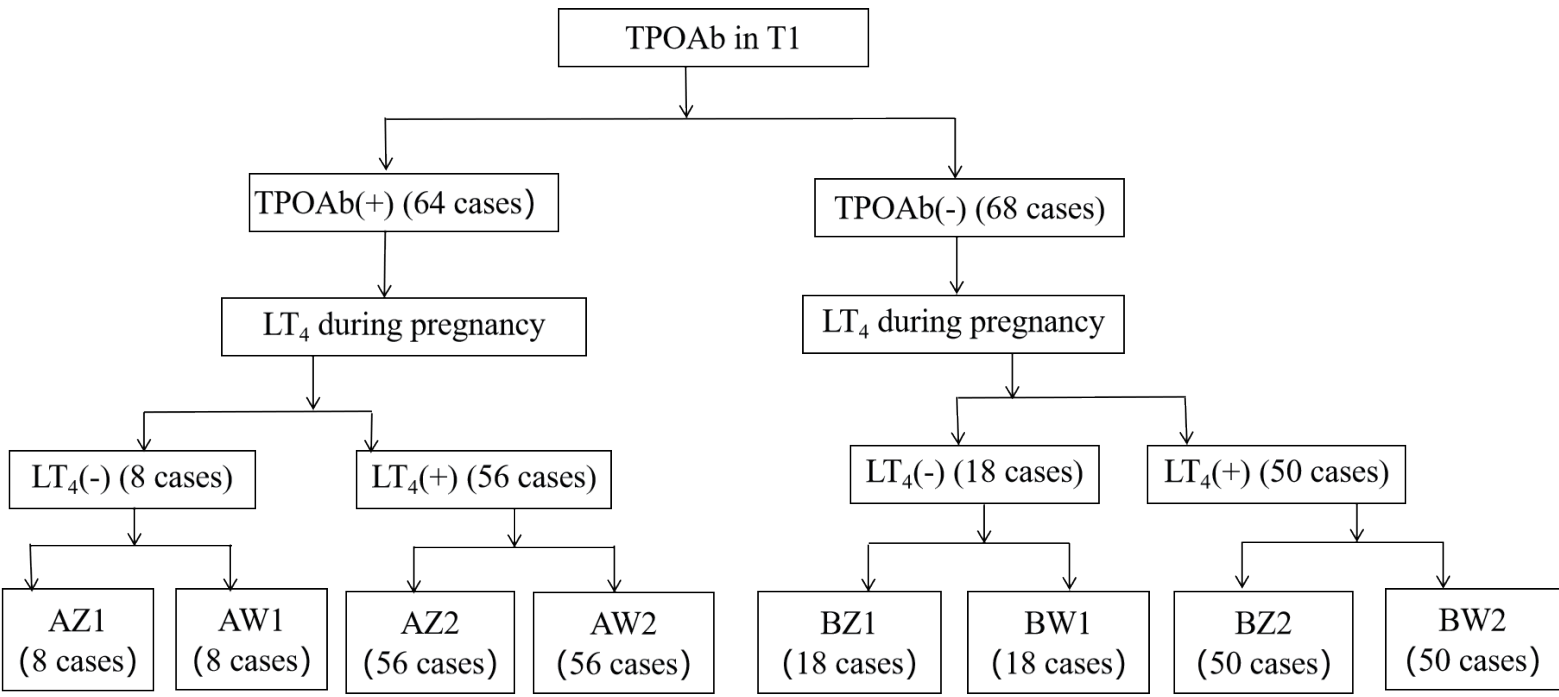

**Flow diagram**

AZ1, TPOAb(+)-LT<sub>4</sub>(-)-T2; AW1, TPOAb(+)-LT<sub>4</sub>(-)-T3;  
 AZ2, TPOAb(+)-LT<sub>4</sub>(+)-T2; AW2, TPOAb(+)-LT<sub>4</sub>(+)-T3;  
 BZ1, TPOAb(-)-LT<sub>4</sub>(-)-T2; BW1, TPOAb(-)-LT<sub>4</sub>(-)-T3;  
 BZ2, TPOAb(-)-LT<sub>4</sub>(+)-T2; BW2, TPOAb(-)-LT<sub>4</sub>(+)-T3.

**Supplementary Fig. 1** Flow diagram. TPOAb-positive/negative women with SCH were stratified depending on whether or not they received LT<sub>4</sub> treatment during pregnancy.
